# Supplementary material for: Polygenic Risk and Social Support in Predicting Depression Under Stress
Source: Atypon-hosted journal article supplement (doi:10.1176/appi.ajp.21111100), 2023-01-11
Supplement: appi.ajp.21111100.ds001.pdf [file appi.ajp.21111100.ds001.pdf]

**Supplemental Tables S1–S4**

Tables S1 and S2 show results of models controlling for individuals’ pre-stressor depressive symptom scores, yielding estimates of effects on new-onset or incident depressive symptoms. As pre-exposure depressive symptoms strongly overlaps with the risk associated with trait neuroticism, neuroticism is not included as a covariate in this model.

| <b>Table S1.</b> Results of zero-inflated Poisson regression for incident depressive symptoms in IHS |                              |             |                  |
|------------------------------------------------------------------------------------------------------|------------------------------|-------------|------------------|
| <i>Predictors</i>                                                                                    | <i>Incidence Rate Ratios</i> | <i>CI</i>   | <i>p</i>         |
| <b>Count portion of model</b>                                                                        |                              |             |                  |
| (Intercept)                                                                                          | 5.48                         | 5.04 – 5.96 | <b>&lt;0.001</b> |
| MDD-PRS                                                                                              | 1.19                         | 1.09 – 1.30 | <b>&lt;0.001</b> |
| Support Change                                                                                       | 0.89                         | 0.87 – 0.91 | <b>&lt;0.001</b> |
| Sex                                                                                                  | 1.06                         | 1.00 – 1.11 | <b>0.038</b>     |
| Age                                                                                                  | 1                            | 0.97 – 1.02 | 0.75             |
| Pre-exposure depressive symptoms                                                                     | 1.23                         | 1.20 – 1.26 | <b>&lt;0.001</b> |
| Support Change x MDD-PRS                                                                             | 0.97                         | 0.95 – 1.00 | <b>0.025</b>     |
| <b>Logistic portion of model</b>                                                                     |                              |             |                  |
| (Intercept)                                                                                          | 0.18                         | 0.08 – 0.38 | <b>&lt;0.001</b> |
| MDD-PRS                                                                                              | 1.09                         | 0.51 – 2.36 | 0.821            |
| Support Change                                                                                       | 1.47                         | 1.15 – 1.88 | <b>0.002</b>     |
| Sex                                                                                                  | 0.39                         | 0.24 – 0.63 | <b>&lt;0.001</b> |
| Age                                                                                                  | 1.25                         | 1.02 – 1.53 | <b>0.033</b>     |
| Pre-exposure depressive symptoms                                                                     | 0.14                         | 0.08 – 0.26 | <b>&lt;0.001</b> |
| Support Change x MDD-PRS                                                                             | 1.09                         | 0.85-1.41   | 0.489            |

| <b>Table S2.</b> Results of zero-inflated Poisson regression for incident depressive symptoms in HRS |                              |             |                  |
|------------------------------------------------------------------------------------------------------|------------------------------|-------------|------------------|
| <i>Predictors</i>                                                                                    | <i>Incidence Rate Ratios</i> | <i>CI</i>   | <i>p</i>         |
| <b>Count portion of model</b>                                                                        |                              |             |                  |
| (Intercept)                                                                                          | 2.96                         | 2.54 – 3.44 | <b>&lt;0.001</b> |
| MDD-PRS                                                                                              | 0.98                         | 0.82 – 1.17 | 0.817            |
| Support Change                                                                                       | 1.07                         | 0.92 – 1.25 | 0.386            |
| Sex                                                                                                  | 0.91                         | 0.77 – 1.09 | 0.315            |
| Age                                                                                                  | 0.9                          | 0.84 – 0.96 | <b>0.002</b>     |
| Pre-exposure Depressive Symptoms                                                                     | 1.22                         | 1.14 – 1.29 | <b>&lt;0.001</b> |
| Support Change x MDD-PRS                                                                             | 0.85                         | 0.72 – 1.00 | <b>0.046</b>     |
| <b>Logistic portion of model</b>                                                                     |                              |             |                  |
| (Intercept)                                                                                          | 0.26                         | 0.13 – 0.51 | <b>&lt;0.001</b> |
| MDD-PRS                                                                                              | 0.5                          | 0.24 – 1.08 | 0.078            |
| Support Change                                                                                       | 0.85                         | 0.46 – 1.56 | 0.594            |
| Sex                                                                                                  | 1.1                          | 0.54 – 2.25 | 0.784            |
| Age                                                                                                  | 1.1                          | 0.83 – 1.45 | 0.501            |
| Pre-exposure Depressive Symptoms                                                                     | 0.69                         | 0.51 – 0.94 | <b>0.019</b>     |
| Support Change x MDD-PRS                                                                             | 0.52                         | 0.26 – 1.07 | 0.075            |

Tables S3 and S4 show results of main models without adjusting for trait neuroticism score at baseline.

| <b>Table S3.</b> Results of zero-inflated Poisson regression for post-exposure depressive symptoms in IHS |                              |               |                  |
|-----------------------------------------------------------------------------------------------------------|------------------------------|---------------|------------------|
|                                                                                                           | <i>Incidence Rate Ratios</i> | <i>95% CI</i> | <i>p</i>         |
| <b>Count portion of model</b>                                                                             |                              |               |                  |
| (Intercept)                                                                                               | 5.68                         | 5.23 – 6.18   | <b>&lt;0.001</b> |
| MDD-PRS                                                                                                   | 1.18                         | 1.08 – 1.28   | <b>&lt;0.001</b> |
| Support Change                                                                                            | 0.87                         | 0.85 – 0.89   | <b>&lt;0.001</b> |
| Sex                                                                                                       | 1.06                         | 1.00 – 1.11   | <b>0.034</b>     |
| Age                                                                                                       | 1.01                         | 0.98 – 1.04   | 0.469            |
| Support Change x MDD-PRS                                                                                  | 0.97                         | 0.95 – 1.00   | <b>0.034</b>     |
| <b>Logistic portion of model</b>                                                                          |                              |               |                  |
| (Intercept)                                                                                               | 0.42                         | 0.23 – 0.78   | <b>0.006</b>     |
| MDD-PRS                                                                                                   | 0.97                         | 0.52 – 1.82   | 0.925            |
| Support Change                                                                                            | 1.56                         | 1.23 – 1.97   | <b>&lt;0.001</b> |
| Sex                                                                                                       | 0.38                         | 0.24 – 0.59   | <b>&lt;0.001</b> |
| Age                                                                                                       | 1.14                         | 0.94 – 1.38   | 0.179            |
| Support Change x MDD-PRS                                                                                  | 1.07                         | 0.84 – 1.36   | 0.594            |

| <b>Table S4.</b> Results of zero-inflated Poisson regression for post-exposure depressive symptoms in HRS |                              |               |                  |
|-----------------------------------------------------------------------------------------------------------|------------------------------|---------------|------------------|
| <i>Predictors</i>                                                                                         | <i>Incidence Rate Ratios</i> | <i>95% CI</i> | <i>p</i>         |
| (Intercept)                                                                                               | 3.03                         | 2.62 – 3.51   | <b>&lt;0.001</b> |
| <b>Count portion of model</b>                                                                             |                              |               |                  |
| MDD-PRS                                                                                                   | 0.96                         | 0.80 – 1.14   | 0.609            |
| Support Change                                                                                            | 1.02                         | 0.87 – 1.18   | 0.837            |
| Sex                                                                                                       | 0.94                         | 0.80 – 1.12   | 0.509            |
| Age                                                                                                       | 0.89                         | 0.83 – 0.95   | <b>0.001</b>     |
| Support Change x MDD-PRS                                                                                  | 0.8                          | 0.68 – 0.94   | <b>0.007</b>     |
| <b>Logistic portion of model</b>                                                                          |                              |               |                  |
| (Intercept)                                                                                               | 0.29                         | 0.16 – 0.54   | <b>&lt;0.001</b> |
| MDD-PRS                                                                                                   | 0.52                         | 0.26 – 1.03   | 0.061            |
| Support Change                                                                                            | 0.9                          | 0.51 – 1.59   | 0.707            |
| Sex                                                                                                       | 1.02                         | 0.53 – 1.99   | 0.947            |
| Age                                                                                                       | 1.12                         | 0.86 – 1.45   | 0.404            |
| Support Change x MDD-PRS                                                                                  | 0.55                         | 0.29 – 1.05   | 0.07             |
